# Supplementary material for: Adsorption for efficient low carbon hydrogen production: part 2—Cyclic experiments and model predictions
Source: Springer Nature journal article supplement (doi:10.1007/s10450-021-00308-w), 2021-03-09
Supplement: MOESM1 [file 18945686]

Supporting Information to:  
Adsorption for efficient low carbon hydrogen  
production – part 2: cyclic experiments and  
model predictions

Anne Streb and Marco Mazzotti\*

*ETH Zurich, Institute of Energy and Process Engineering, 8092 Zurich, Switzerland*

E-mail: [marco.mazzotti@ipe.mavt.ethz.ch](mailto:marco.mazzotti@ipe.mavt.ethz.ch)

# S1 Temperature profiles

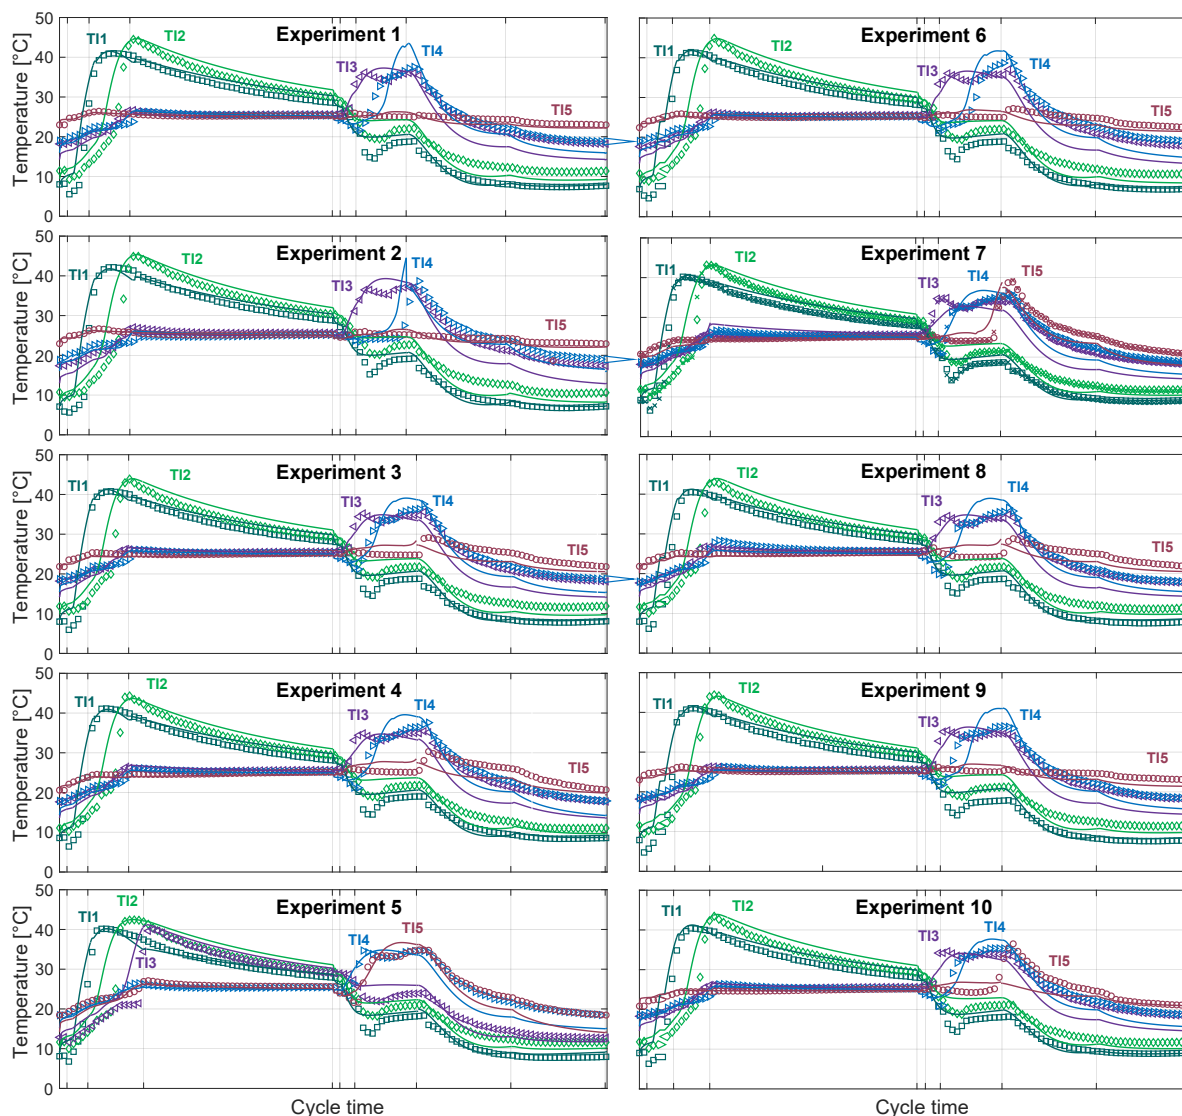

Figure S1: Measured (symbols) and simulated (lines) temperature profiles in cyclic steady state (CSS) for column 1 and Experiments 1-10. Multi-component adsorption is modeled using the real adsorbed solution theory (RAST) and  $\bar{\lambda}_i = 4000$ . T11-T15 are positioned at 10, 35, 60, 85 and 110 cm from the column bottom. The temperature profiles for the repetition of experiment 7 are shown with crosses showing excellent reproducibility

## S2 Composition profiles experiment 5

Figure S2 shows the measured and simulated composition profiles for experiment 5.  $\text{CH}_4$  breakthrough occurs at the end of the adsorption step. There is a time delay of a few seconds between the column outlet and the MS downstream of the column during adsorption, such that the simulated breakthrough occurs shifted in time by a few seconds. The  $\text{H}_2$  produced during the last few seconds of Ads cannot be measured experimentally, which is why the model predicts a lower  $\text{H}_2$  purity than seen in the experiment. Note that during HP,  $\text{CO}_2$  breakthrough occurs at around the middle of the step (simulation) but is perceived only toward the end of the step with an rapid increase in measured  $\text{CO}_2$  content, due to the time delay between column and MS.

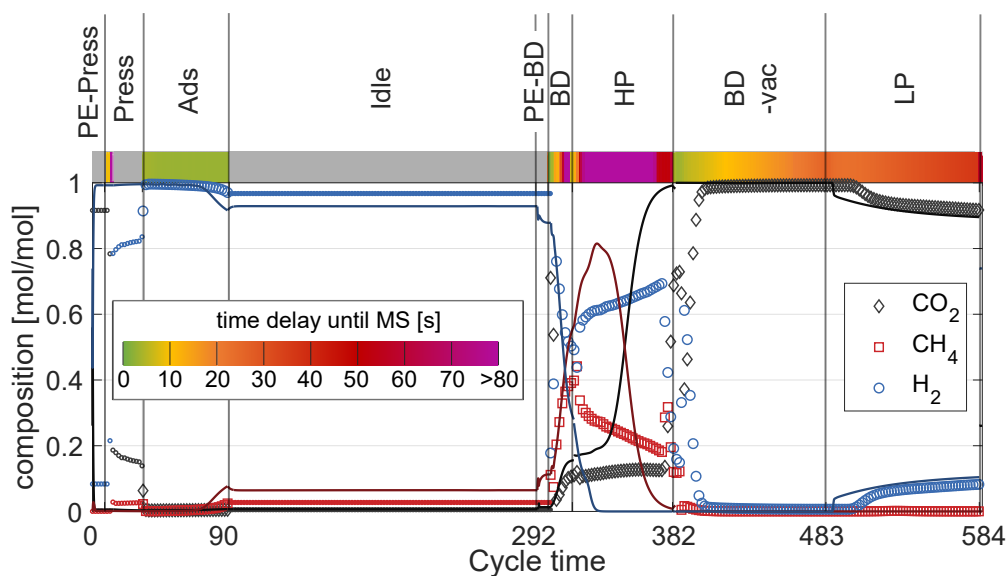

Figure S2: Measured (symbols) and simulated (lines) composition profiles in CSS for experiment 5. Multi-component adsorption is modeled using the real adsorbed solution theory (RAST) and  $\bar{\lambda}_i = 4000$ . The bar at the top indicates the time delay from the column outlet until the composition is measured at the MS
